# Supplementary material
Source: Springer Nature journal article supplement (https://www.springermedizin.de/resource/supplementary/12906_2013_1781_MOESM1_ESM.pdf/9522832)
Supplement: MOESM1 [file 9522832]

**Recruitment n = 59**

- Health care professionals
- Community groups
- Media – local radio and newspapers

**Screening**

Women with clinically diagnosed unilateral secondary arm lymphoedema from breast cancer treatment

- Six months post-breast cancer treatment
- >18 years; able to comprehend English

**Exclusion criteria**

- Primary lymphoedema, infections, recurrent cancer
- Psychological illness
- Receiving other lymphoedema treatment
- Commencement of new activity during trial

**Did not participate n=31**

Did not meet criteria n=13

Declined participation n=18

**Baseline measurement n=28**

Manual for best current care

**Randomisation**

Intervention n = 15; Control n = 13

**Intervention**

8 weekly teacher-led classes 1.5 hours long

- Home-based program by DVD 42 mins

**Control**

- Usual care-manual
- Wait-listed yoga post-week 12 measurement

**Week 8 measurement n=12**

Lost to:

- surgery (1)
- broken hip (1)
- acute illness (1)

**Week 8 measurement n=11**

Lost to:

- became guardian for grandchild (1)
- acute illness (1)

**Week 12 measurement n=9**

Lost to:

- recurrent cancer (1)
- acute illness (1)
- overseas (1)

**Week 12 measurement n=10**

Lost to:

- recurrent cancer (1)

**Control group**

8 weekly teacher-led classes and DVD home-practice
